# Supplementary material for: CuAAC click chemistry for the enhanced detection of novel alkyne-based natural product toxins
Source: Chem Commun (Camb). 2018 Oct 12;54(86):12234–7. doi: 10.1039/c8cc05113e (PMC6243676; doi:10.1039/c8cc05113e)
Supplement: Supplementary file 2 [file CC-054-C8CC05113E-s002.xlsx]

## Sheet: Sheet1
Strain	Prymnesin type	Measured aglycone [M +2H]	Lock mass	Elemental Comp	ppm	Measured [M + 2H]	Lock Mass	Elemental Composition	ppm	Measured [M +H +Na]	Lock mass	Elemental Composition	ppm	Sugars	Measured aglycone clicked [M +2H]	Lock Mass	Elemental Composition	ppm	Measured clicked [M +2H]	Lock Mass	Elemental Composition	ppm
P. parvum 946/6	Prymnesin-A1	918.881	918.884	C91H128Cl3NO31	0.622	1131.95	1131.95	C107H154Cl3NO44	4.012	1142.95	1142.94	C107H154Cl3NO44	3.662	2x Pentose, 1x Hexose		1020.4	C100H133Cl3N4O34	4.034		1233.46	C116H159Cl3N4O47	3.719
	Prymnesin-A2	918.894	918.885	C91H128Cl3NO31	1.337	984.906	984.904	C96H136Cl3NO35	1.524	995.896	995.896	C96H136Cl3NO35	0.274	1x Pentose						1086.42	C105H141Cl3N4O38	3.908
P. parvum 94A	Prymnesin-A1	918.912	918.88	C91H128Cl3NO31	4.648	1131.97	1131.95	C107H154Cl3NO44	5.956	1142.97	1142.94	C107H154Cl3NO44	3.075	2x Pentose, 1x Hexose		1020.39	C100H133Cl3N4O34	6.386		1233.46	C116H159Cl3N4O47	7.448
	Prymnesin-A2	918.912	918.88	C91H128Cl3NO31	4.213	984.926	984.9	C96H136Cl3NO35	5.483	995.931	995.892	C96H136Cl3NO35	4.19	1x Pentose						1086.42	C105H141Cl3N4O38	6.025
P. sp. 595	Prymnesin-B	828.916	828.891	C85H122ClNO29	6.911	828.916	828.891	C85H122ClNO29	6.911	839.912	839.882	C85H122ClNO29	7.264	N/A		ND	ND	ND		ND	ND	ND
	Prymnesin-B1	828.916	828.889	C85H122ClNO29	9	909.949	909.918	C91H132ClNO34	5.979	920.938	920.909	C91H132ClNO34	5.118	1x Hexose		ND	ND	ND		ND	ND	ND
	Prymnesin-B6	845.907	845.876	C85H121Cl2NO29	2.06	845.907	845.876	C85H121Cl2NO29	2.06	856.899	856.867	C85H121Cl2NO29	1.768	N/A		947.388	C94H126Cl2N4O32	5.793		947.389	C94H126Cl2N4O32	5.054
	Prymnesin-B7	845.907	845.875	C85H121Cl2NO29	3.361	926.922	926.899	C91H131Cl2NO34	4.914	937.92	937.892	C91H131Cl2NO34	2.801	1x Hexose						1028.41	C100H136Cl2N4O37	6.029
P. patelliferum 527D	Prymnesin-D1	883.854	883.827	C85H114Cl3NO32	0.279	1096.93	1096.89	C101H140Cl3NO45	7.497	1107.91	1107.89	C101H140Cl3NO45	0.545	2x Pentose, 1x Hexose		985.344	C94H119Cl3N4O35	0.407		1209.4011*	C110H145Cl3N4O48	1.523
	Prymnesin-D2	883.854	883.83	C85H114Cl3NO32	3.447	949.87	949.848	C90H122Cl3NO36	0.545	960.866	960.841	C90H122Cl3NO36	1.712	1x Pentose						1051.36	C99H127Cl3N4O39	2.595
	Prymnesin-D3	865.855	865.839	C85H113Cl2NO32	0.214	1078.93	1078.91	C101H139Cl2NO45	0.727	1089.93	1089.9	C101H139Cl2NO45	0.878	2x Pentose, 1x Hexose		967.351	C94H118Cl2N4O35	4.094		1180.43	C110H144Cl2N4O48	5.565
	Prymnesin-D4	865.855	865.839	C85H113Cl2NO32	0.445	931.886	931.859	C90H121Cl2NO36	0.691	942.873	942.849	C90H121Cl2NO36	1.29	1x Pentose						1033.38	C99H126Cl2N4O39	0.667
